# Supplementary material for: Searching for a fabrication route of efficient Cu2ZnSnS4 solar cells by post-sulfuration of co-sputtered Sn-enriched precursors
Source: Royal Society of Chemistry journal article supplement (doi:10.1039/c5tc02486b), 2015-01-01

## Supplementary Information:

Figure S1: Cross sectional SEM images of absorbers annealed at different temperature with 2.5%  $\text{H}_2\text{S}$  concentration: (a) 330 °C, (b) 430 °C, (c) 520 °C and (d) the Cu/Sn ratio comparison between top half, bottom half and overall portion.

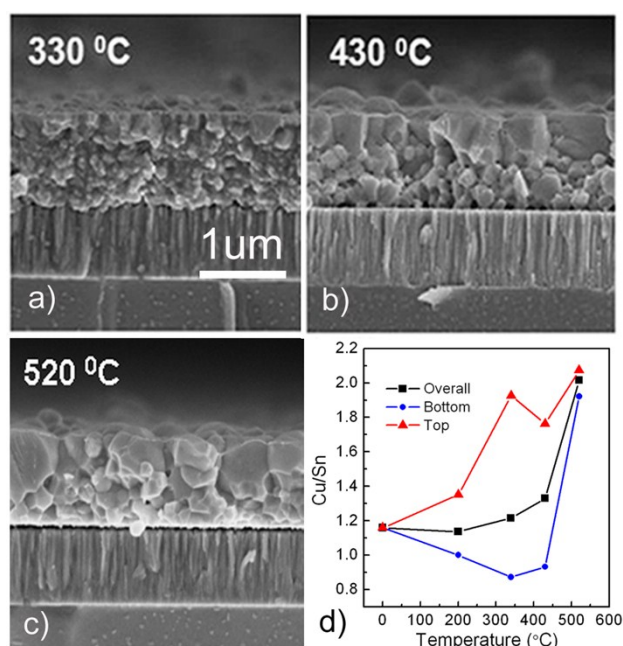

Figure S2: Cross sectional SEM images of the cleaved absorbers annealed at different ramping rate: (a) 12 °C/min, (b) 5 °C/min and (c) 3 °C/min.

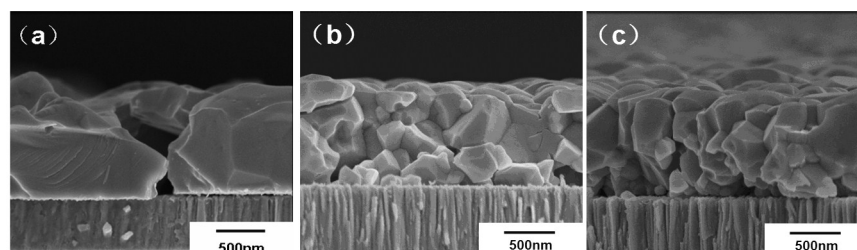

Supplement: c5tc02486b1.pdf [file c5tc02486b1.pdf]
